# Supplementary material for: Impairment of early fracture healing by skeletal muscle trauma is restored by FK506
Source: PubMed Central journal article supplement (PMC5469075; doi:10.1186/s12891-017-1617-y), 2017-06-12

A

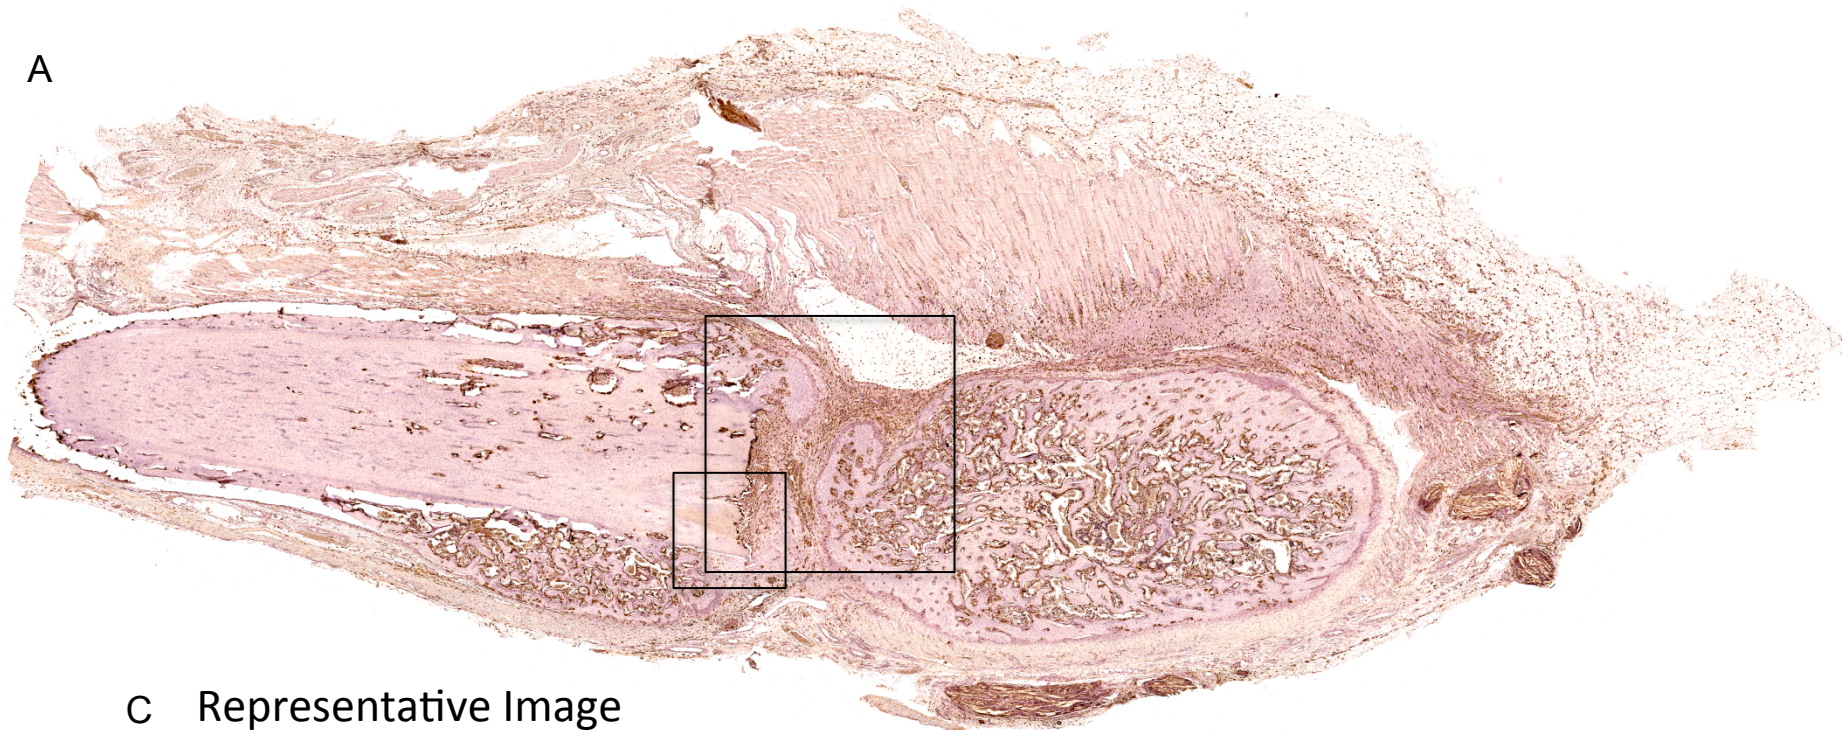

C Representative Image

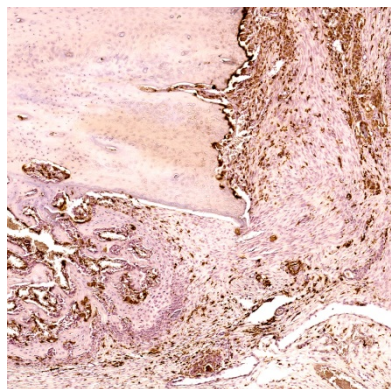

B Selected Region

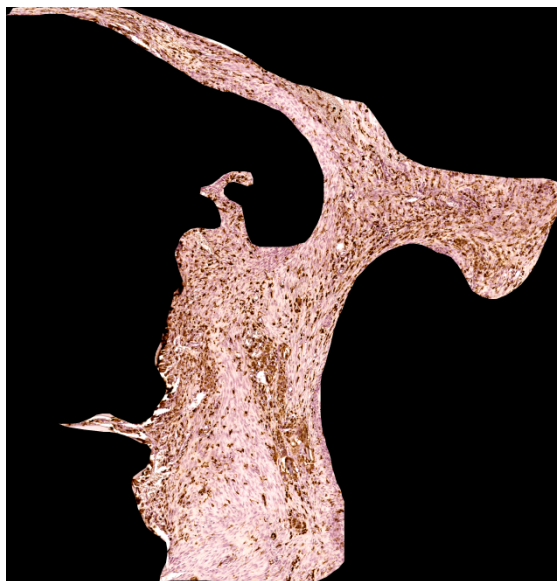

Supplement: 12891_2017_1617_MOESM1_ESM.pdf [file 12891_2017_1617_MOESM1_ESM.pdf]
